# Supplementary material for: Long term follow-up in two siblings with Sengers syndrome: Case report
Source: Springer Nature journal article supplement (doi:10.1186/s13052-022-01370-y), 2022-10-17
Supplement: MOESM1 [file 23612166]

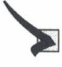

| Topic                    | Item | Checklist item description                                                                             | Reported on Line                                                    |
|--------------------------|------|--------------------------------------------------------------------------------------------------------|---------------------------------------------------------------------|
| Title                    | 1    | The diagnosis or intervention of primary focus followed by the words "case report"                     | 2                                                                   |
|                          | 2    | 2 to 5 key words that identify diagnoses or interventions in this case report, including "case report" | 33                                                                  |
|                          | 3a   | Introduction: What is unique about this case and what does it add to the scientific literature?        | 30-31                                                               |
|                          | 3b   | Main symptoms and/or important clinical findings                                                       | 29                                                                  |
| Abstract (no references) | 3c   | The main diagnoses, therapeutic interventions, and outcomes                                            | 29                                                                  |
|                          | 3d   | Conclusion—What is the main "take-away" lesson(s) from this case?                                      | 30-31                                                               |
| Introduction             | 4    | One or two paragraphs summarizing why this case is unique (may include references)                     | 48-50                                                               |
|                          | 5a   | De-identified patient specific information                                                             | 53 + 101                                                            |
| Patient Information      | 5b   | Primary concerns and symptoms of the patient                                                           | 55 + 101-104                                                        |
|                          | 5c   | Medical, family, and psycho-social history including relevant genetic information                      | 53 + 101                                                            |
|                          | 5d   | Relevant past interventions with outcomes                                                              | 53-57 + 102-103                                                     |
|                          | 6    | Describe significant physical examination (PE) and important clinical findings                         | 58 + 107                                                            |
| Timeline                 | 7    | Historical and current information from this episode of care organized as a timeline                   |                                                                     |
|                          | 8a   | Diagnostic testing (such as PE, laboratory testing, imaging, surveys)                                  | 62-95 + 110-131                                                     |
| Diagnostic Assessment    | 8b   | Diagnostic challenges (such as access to testing, financial, or cultural)                              |                                                                     |
|                          | 8c   | Diagnosis (including other diagnoses considered)                                                       | 117-118 + 105-108                                                   |
| Therapeutic Intervention | 8d   | Prognosis (such as staging in oncology) where applicable                                               |                                                                     |
|                          | 9a   | Types of therapeutic intervention (such as pharmacologic, surgical, preventive, self-care)             | 110 + 118                                                           |
| Follow-up and Outcomes   | 9b   | Administration of therapeutic intervention (such as dosage, strength, duration)                        | 100 + 118                                                           |
|                          | 9c   | Changes in therapeutic intervention (with rationale)                                                   |                                                                     |
|                          | 10a  | Clinician and patient-assessed outcomes (if available)                                                 |                                                                     |
| Discussion               | 10b  | Important follow-up diagnostic and other test results                                                  |                                                                     |
|                          | 10c  | Intervention adherence and tolerability (How was this assessed?)                                       | 86-92-119-121 + 123-                                                |
|                          | 10d  | Adverse and unanticipated events                                                                       |                                                                     |
|                          | 11a  | A scientific discussion of the strengths AND limitations associated with this case report              |                                                                     |
| Patient Perspective      | 11b  | Discussion of the relevant medical literature with references                                          | 142-148                                                             |
|                          | 11c  | The scientific rationale for any conclusions (including assessment of possible causes)                 |                                                                     |
| Informed Consent         | 11d  | The primary "take-away" lessons of this case report (without references) in a one paragraph conclusion | 144-148                                                             |
|                          | 12   | The patient should share their perspective in one to two paragraphs on the treatment(s) they received  |                                                                     |
|                          | 13   | Did the patient give informed consent? Please provide if requested                                     | Yes <input checked="" type="checkbox"/> No <input type="checkbox"/> |
